# Supplementary material for: Efficacy and outcome analysis: monotherapy and combination therapy of S-1 for patients with advanced non-small cell lung cancer
Source: PubMed Central journal article supplement — J Thorac Dis. 2024 Oct 30;16(10):6483–95. doi: 10.21037/jtd-24-940 (PMC11565327; doi:10.21037/jtd-24-940), 2024-10-30
Supplement: jtd-16-10-6483-dss.pdf [file jtd-16-10-6483-dss.pdf]

## Data Sharing Statement

|                     |                                                                                                                                                     |                                                                                                                                                       |
|---------------------|-----------------------------------------------------------------------------------------------------------------------------------------------------|-------------------------------------------------------------------------------------------------------------------------------------------------------|
| <b>Article Info</b> | <a href="https://dx.doi.org/10.21037/jtd-24-940">https://dx.doi.org/10.21037/jtd-24-940</a>                                                         |                                                                                                                                                       |
| <b>Item</b>         | <b>Question</b>                                                                                                                                     | <b>Authors' Response<br/>(place "-" if not applicable)</b>                                                                                            |
| 1                   | Would you like to share data collected for your study to others?                                                                                    | Yes                                                                                                                                                   |
| 2                   | If not, would you like to share the reason for your decision?                                                                                       | -                                                                                                                                                     |
| 3                   | What data in particular will be shared?                                                                                                             | The survival data will be shared.                                                                                                                     |
| 4                   | Any other documents will be shared? Such as study protocol, statistical analysis plan, informed consent form, clinical study report, analytic code. | Study protocol and statistical analysis plan will also be shared if requested.                                                                        |
| 5                   | When will data availability begin?                                                                                                                  | From the publication date.                                                                                                                            |
| 6                   | When will data availability end?                                                                                                                    | Two years within the publication date, since the technique or survival data may be updated over time.                                                 |
| 7                   | To whom will you share the data?                                                                                                                    | Oncologists who are interested in the treatment of lung cancer.                                                                                       |
| 8                   | For what type of analysis or purpose?                                                                                                               | For analysis to evaluate the efficacy and safety of monotherapy and combination therapy of S-1 for patients with advanced non-small-cell lung cancer. |
| 9                   | How or where can the data/documents be obtained?                                                                                                    | Emails could be sent to the address below to obtain the shared data: hongwei@zjcc.org.cn.                                                             |
| 10                  | Any other restrictions?                                                                                                                             | We may balance the potential benefits and risks for each request and then provide the data that could be shared.                                      |
